# Supplementary material for: Au nanoparticles fluorescence switch-mediated target recycling amplification strategy for sensitive nucleic acid detection
Source: Royal Society of Chemistry journal article supplement (doi:10.1039/c5ra23761k), 2016-01-01
Supplement: c5ra23761k1.pdf [file c5ra23761k1.pdf]

# **Au Nanoparticles Fluorescence Switch-mediated Target Recycling Amplification Strategy for Sensitive Nucleic Acid Detection**

**Haiping Wei <sup>a</sup>, Yan Wang <sup>b,\*</sup>, Hong Zhang <sup>a</sup>, Haiyan Zhao <sup>a</sup>, Wei Jiang <sup>a,\*</sup>**

*<sup>a</sup> Key Laboratory for Colloid and Interface Chemistry of Education Ministry, School  
of Chemistry and Chemical Engineering, Shandong University, 250100 Jinan, P.R.  
China*

*<sup>b</sup> The 88th Hospital of PLA, 270100 Tai'an, P.R. China*

Corresponding author<sup>a</sup>: Tel: 86-531-88363888; fax: 86-531-88564464.

E-mail: [wjiang@sdu.edu.cn](mailto:wjiang@sdu.edu.cn)

Corresponding author<sup>b</sup>: E-mail: [wy6766@sohu.com](mailto:wy6766@sohu.com)

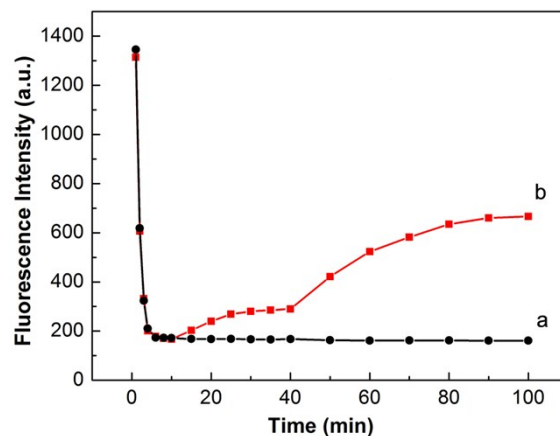

**Fig. S1.** The change in fluorescence during the detection procedure. Condition: pH: 8.0, Temperature: 37 °C, F-DNA:  $5.0 \times 10^{-8}$  mol L<sup>-1</sup>, T-DNA:  $5.0 \times 10^{-9}$  mol L<sup>-1</sup>, Exo III:  $1.3 \times 10^6$  U L<sup>-1</sup>.

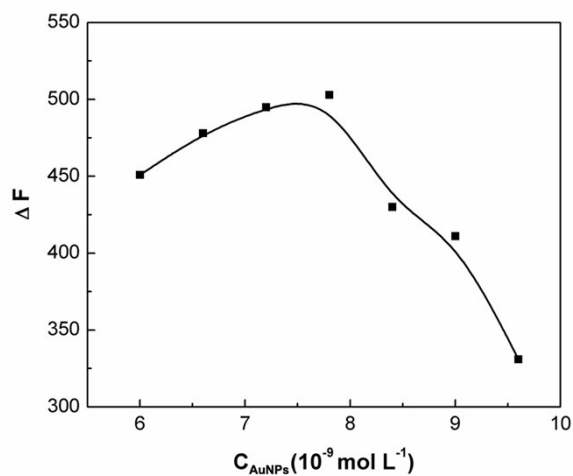

**Fig. S2.** Effects of the concentration of AuNPs. Condition: pH: 8.0, Temperature: 37 °C, F-DNA:  $5.0 \times 10^{-8}$  mol L<sup>-1</sup>, T-DNA:  $5.0 \times 10^{-9}$  mol L<sup>-1</sup>, Exo III:  $1.3 \times 10^6$  U L<sup>-1</sup>. 10 min incubation time of F-DNA and AuNPs, 30 min hybridization time of F-DNA on AuNPs surface and T-DNA, 60 min incubation time of Exo III.

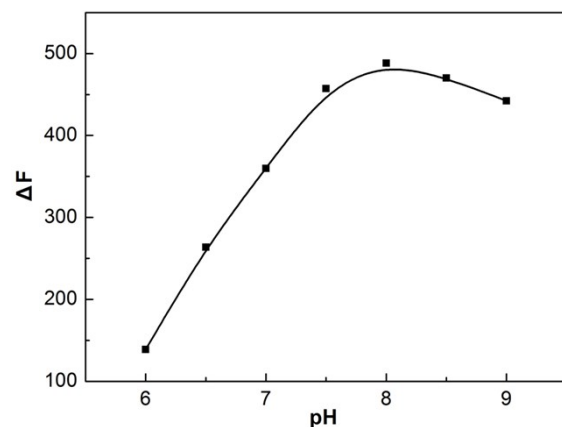

**Fig. S3.** Effects of the pH. Condition: Temperature: 37 °C, F-DNA:  $5.0 \times 10^{-8}$  mol L<sup>-1</sup>, T-DNA:  $5.0 \times 10^{-9}$  mol L<sup>-1</sup>, Exo III:  $1.3 \times 10^6$  U L<sup>-1</sup>. 10 min incubation time of F-DNA and AuNPs, 30 min hybridization time of F-DNA on AuNPs surface and T-DNA, 60 min incubation time of Exo III.

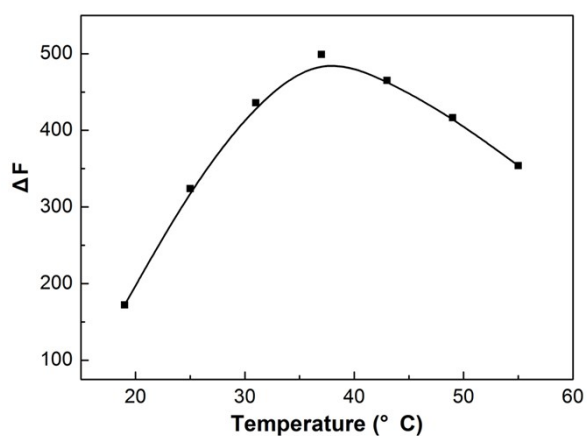

**Fig. S4.** Effects of the reaction temperature. Condition: pH: 8.0, F-DNA:  $5.0 \times 10^{-8}$  mol L<sup>-1</sup>, T-DNA:  $5.0 \times 10^{-9}$  mol L<sup>-1</sup>, Exo III:  $1.3 \times 10^6$  U L<sup>-1</sup>. 10 min incubation time of F-DNA and AuNPs, 30 min hybridization time of F-DNA on AuNPs surface and T-DNA, 60 min incubation time of Exo III.

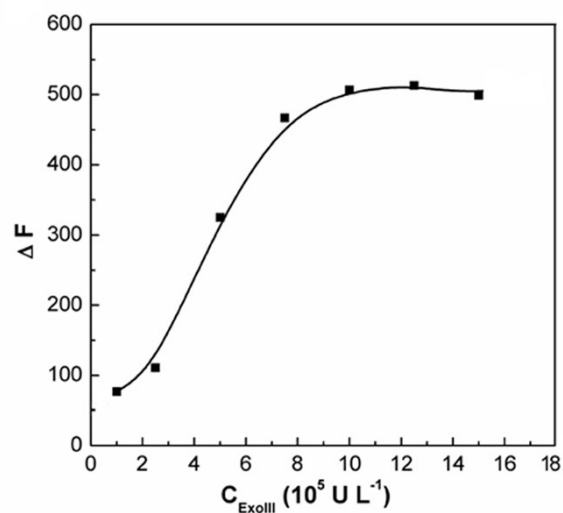

**Fig. S5.** Effects of concentrations of Exo III. Condition: pH: 8.0, Temperature: 37 °C, F-DNA:  $5.0 \times 10^{-8} \text{ mol L}^{-1}$ , AuNPs:  $7.8 \times 10^{-9} \text{ mol L}^{-1}$ , T-DNA:  $5.0 \times 10^{-9} \text{ mol L}^{-1}$ . 10 min incubation time of F-DNA and AuNPs, 30 min hybridization time of F-DNA on AuNPs surface and T-DNA, 60 min incubation time of Exo III.

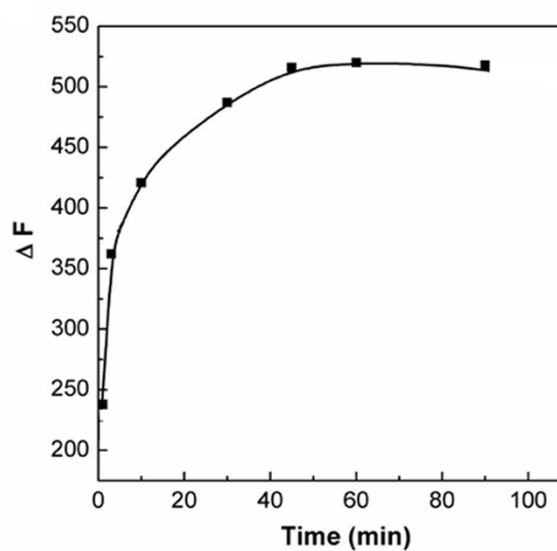

**Fig. S6.** Effects of incubation time of Exo III. Condition: pH: 8.0, Temperature: 37 °C, F-DNA:  $5.0 \times 10^{-8} \text{ mol L}^{-1}$ , AuNPs:  $7.8 \times 10^{-9} \text{ mol L}^{-1}$ , T-DNA:  $5.0 \times 10^{-9} \text{ mol L}^{-1}$ , , Exo III:  $1.3 \times 10^6 \text{ U L}^{-1}$ . 10 min incubation time of F-DNA and AuNPs, 30 min hybridization time of F-DNA on AuNPs surface and T-DNA.

**Table S1** Comparison of the nanomaterial-based fluorescent methods for DNA detection

| Strategy                                                                                         | Nanomaterial                   | Synthesis procedure of the nanomaterial                                                                                                                                                                                            | Detection limit<br>(mol·L <sup>-1</sup> ) | Ref.        |
|--------------------------------------------------------------------------------------------------|--------------------------------|------------------------------------------------------------------------------------------------------------------------------------------------------------------------------------------------------------------------------------|-------------------------------------------|-------------|
| The fluorescent oligonucleotide with carbon nanotubes and target DNA                             | single walled carbon nanotubes | The purchased single walled carbon nanotubes were sonicated in DMF for 5 h.                                                                                                                                                        | $4.0 \times 10^{-9}$                      | 1           |
| The carbon nanotube-based nanobeacon for detection of DNA                                        | single walled carbon nanotubes | The purchased nanotubes were refluxed in HNO <sub>3</sub> for 2 days, and the precipitates were oxidized by HNO <sub>3</sub> /H <sub>2</sub> SO <sub>4</sub> for 4 h, and then the products were kept in an oven at 50 °C for 5 h. | $4.2 \times 10^{-11}$                     | 2           |
| A graphene platform for sensing biomolecules                                                     | graphene oxide                 | The graphene oxide were synthesized from natural graphite powder by a modified Hummers method.                                                                                                                                     | $1.0 \times 10^{-9}$                      | 3           |
| Graphene and HpaII-based fluorescent strategy for DNA detection                                  | graphene oxide                 | The graphene oxide were synthesized by the Hummers method.                                                                                                                                                                         | $4.3 \times 10^{-11}$                     | 4           |
| A conjugation polymer nanobelts platform for nucleic acid detection                              | conjugation polymer nanobelts  | The conjugation polymer nanobelts were synthesized with chemical oxidation polymerization of p-phenylenediamine monomers.                                                                                                          | $3.0 \times 10^{-8}$                      | 5           |
| Fluorescence-enhanced nucleic acid detection with Pd nanowires                                   | Pd nanowires                   | Te nanowires were synthesized with hydrothermal method, and Te nanowires mixed with H <sub>2</sub> PdCl <sub>4</sub> solution was stirred, and then centrifuged and washed for Pd nanowires.                                       | $3.0 \times 10^{-10}$                     | 6           |
| The different interaction between ss-DNA or ds-DNA and MoS <sub>2</sub> nanosheets               | MoS <sub>2</sub> nanosheets    | MoS <sub>2</sub> nanosheets were synthesized by exfoliating bulk MoS <sub>2</sub> using electrochemical lithium-intercalation method.                                                                                              | $5.0 \times 10^{-10}$                     | 7           |
| The affinity change of carbon nitride nanosheets to DNA probes upon their recognition to targets | carbon nitride nanosheets      | Carbon nitride nanosheets were prepared by sonicating bulk graphitic-phase carbon nitride, which was first synthesized by polymerization of melamine.                                                                              | $8.1 \times 10^{-11}$                     | 8           |
| Au nanoparticles fluorescence switch-mediated target recycling strategy                          | Au nanoparticles               | The mixture of chloroauric acid and sodium citrate were maintained at 100 °C for 20 min with stirring.                                                                                                                             | $1.0 \times 10^{-11}$                     | this method |

## References

- 1 R. H. Yang, J. Y. Jin, Y. Chen, N. Shao, H. Z. Kang, Z. Y. Xiao, Z. W. Tang, Y. R. Wu, Z. Zhu, W. H. Tan, *J. Am. Chem. Soc.*, 2008, **130**, 8351-8358.
- 2 J. Chen, Y. Huang, M. Shi, S. L. Zhao, Y. C. Zhao, *Talanta*, 2013, **109**, 160-166.
- 3 C. H. Lu, H. H. Yang, C. L. Zhu, X. Chen, G. N. Che, *Angew. Chem. Int. Ed.*, 2009, **48**, 4785-4787.
- 4 W. Wei, C. Y. Gao, Y. X. Xiong, Y. J. Zhang, S. Q. Liu, Y. P. Pu, *Talanta*, 2015, **131**, 342-347.
- 5 L. Wang, Y. W. Zhang, J. Q. Tain, H. L. Li, X. P. Sun, *Nucleic Acids Res.*, 2011, **39**, e37.
- 6 L. B. Zhang, S.J. Guo, S. J. Dong, E. K. Wang, *Anal. Chem.*, 2012, **84**, 3568-3573.
- 7 C. F. Zhu, Z. Y. Zeng, H. Li, F. Li, C. H. Fan, H. Zhang, *J. Am. Chem. Soc.*, 2013, **135**, 5998-6001.
- 8 Q. B. Wang, W. Wang, J. P. Lei, N. Xu, F. L. Gao, H. X. Ju, *Anal. Chem.*, 2013, **85**, 12182-12188.
